# Supplementary material for: Oncogenic Signalling of PEAK2 Pseudokinase in Colon Cancer
Source: MDPI journal article supplement (doi:10.3390/cancers14122981), 2022-06-16
Supplement: s1 [file s1]

## Supplementary Materials: Oncogenic Signalling of PEA2 Pseudokinase in Colon Cancer

Céline Lecointre, Elise Fourgous, Ingrid Montarras, Clément Kerneur, Valérie Simon, Yvan Boublik, Débora Bonenfant, Bruno Robert, Pierre Martineau and Serge Roche

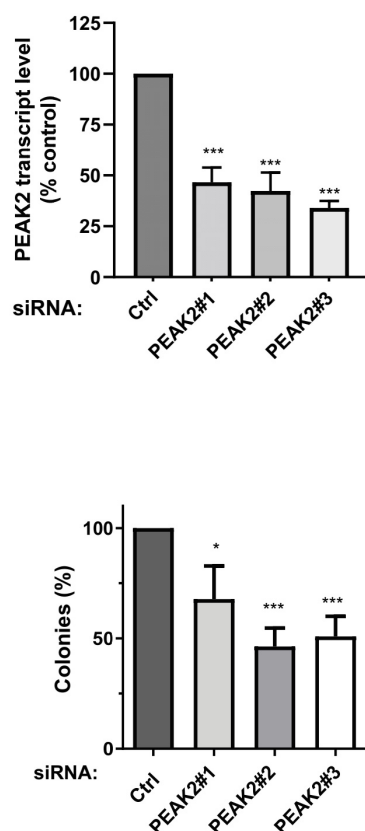

**Figure S1.** effect of siRNAs targeting PEA2 expression colonies formation in the Lovo CRC cells in soft agar. A. relative PEA2 transcript level in cells transfected with indicated siRNA. B. Anchorage-independent growth in soft agar of CRC cells transfected with indicated siRNA. Is shown mean  $\pm$  SEM;  $n = 3$ ; \* $p < 0.05$ ; \*\* $p < 0.01$ ; \*\*\* $p < 0.001$  (Student's  $t$  test).

**A**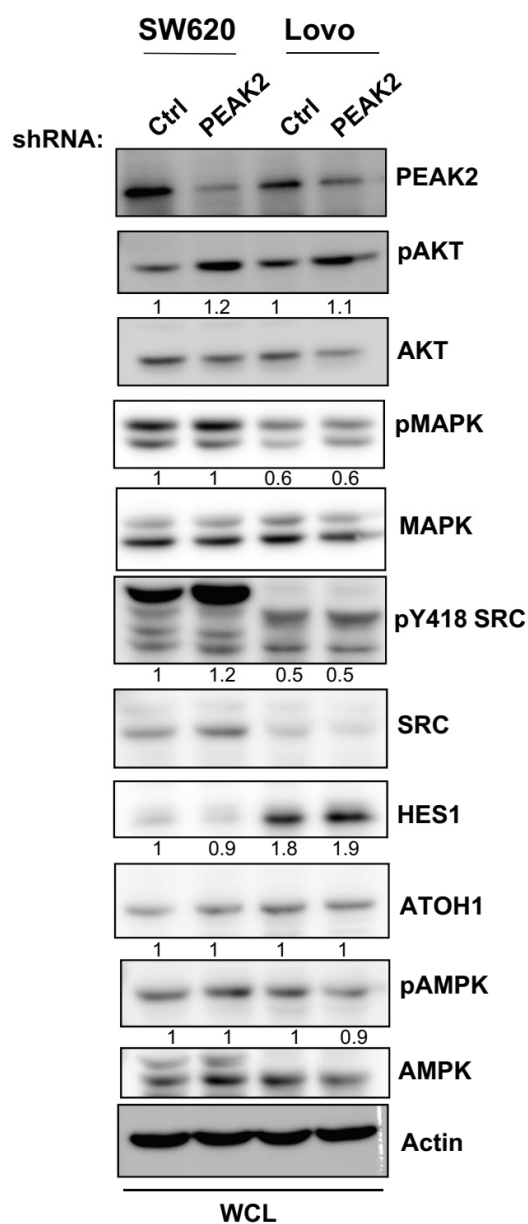**B**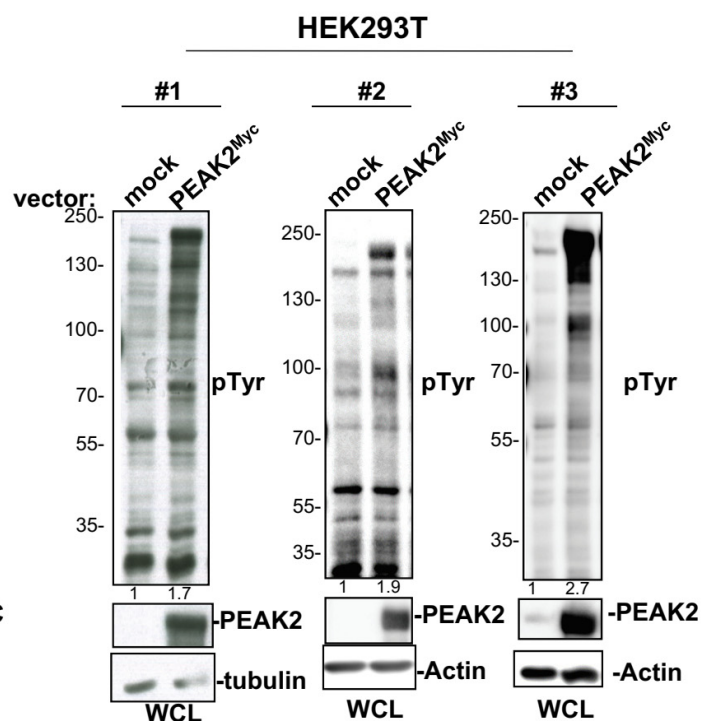

**Figure S2.** PEA2 depletion does not affect RTK or Notch signaling in CRC cells. Is shown MAPK, AKT, Src, Notch and AMPK activities in CRC cells depleted or not PEA2.

**A**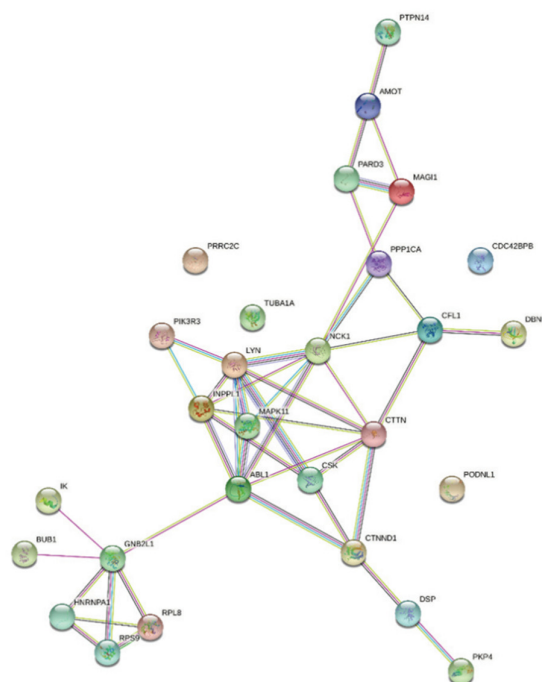**B**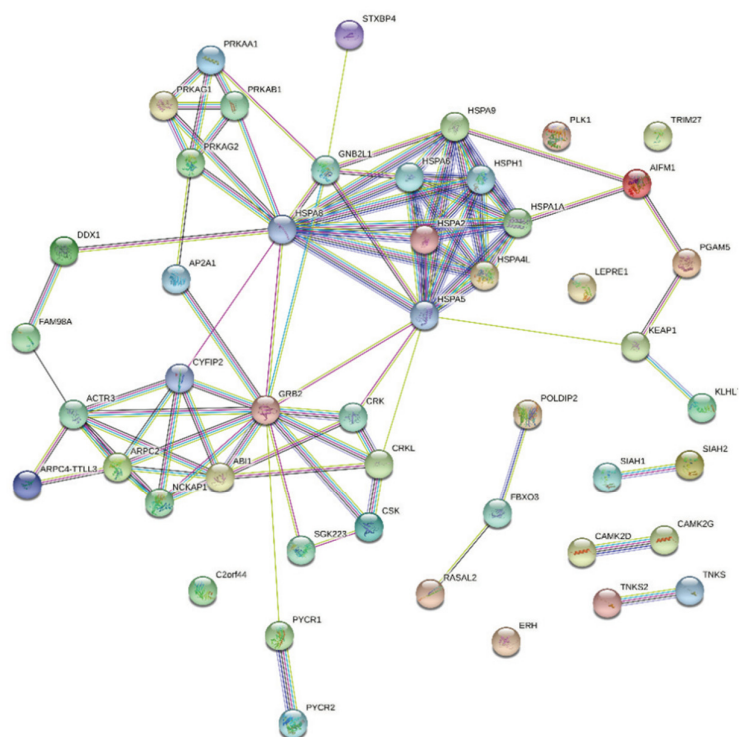

**Figure S3.** string analysis of PEAK2 phospho-proteomic (A) and interactomic analysis (50 main hits) (B). This analysis reveals regulators of F-actin assembly as important components of PEAK2 phospho-signaling.

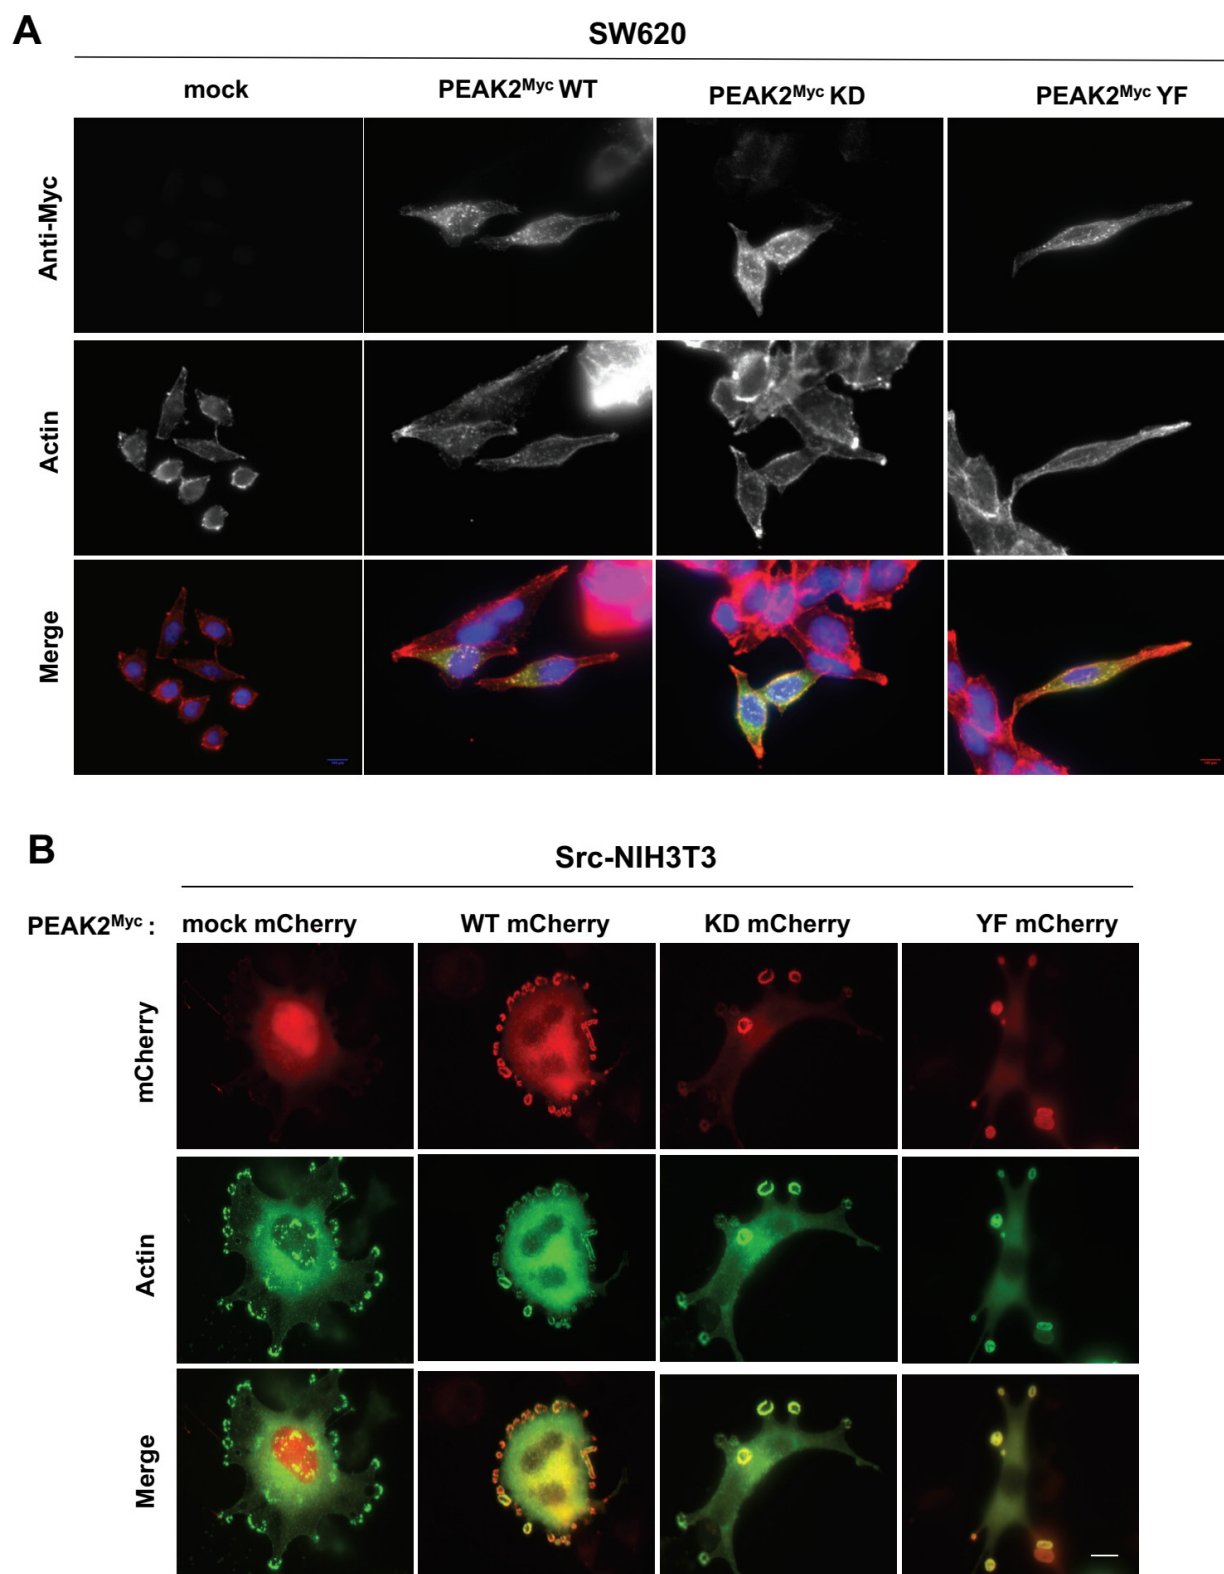

**Figure S4.** PEAK2 co-localizes with F-actin structures at focal adhesion of transformed cells. Immunostaining of PEAK2<sup>Myc</sup> and F-actin in SW620 and SrcYFNIH3T3.

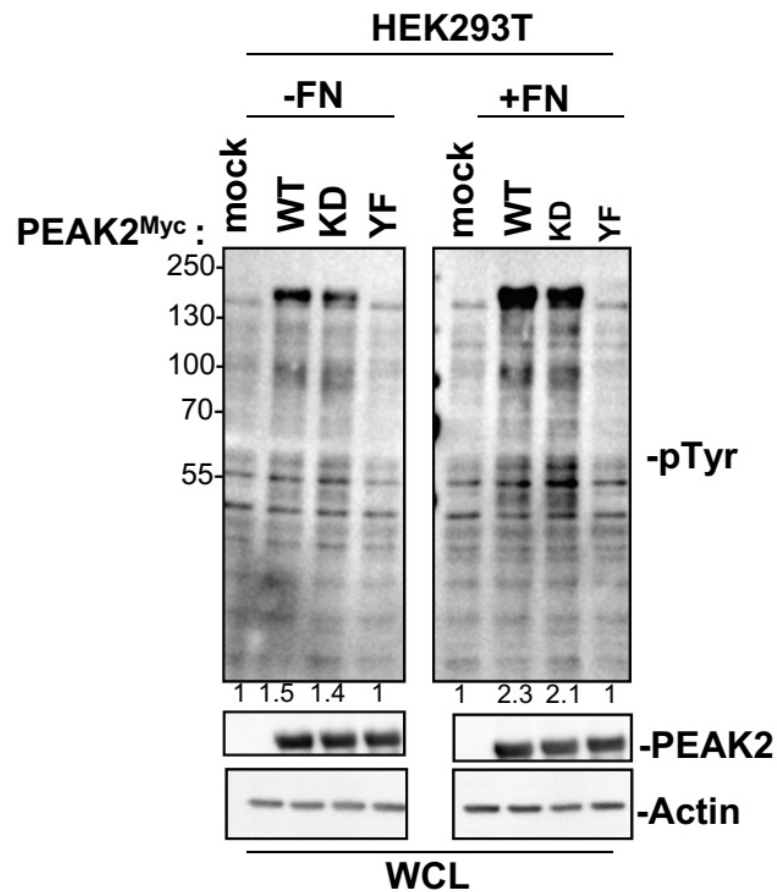

**Figure S5.** Fibronectin induces Y413-dependent PEAK2 phospho-tyrosine signaling. Protein tyrosine phosphorylation induced by indicated PEAK2 mutants transiently transfected in HEK293T cells that were coated or not with fibronectin (FN).

Figure 1A

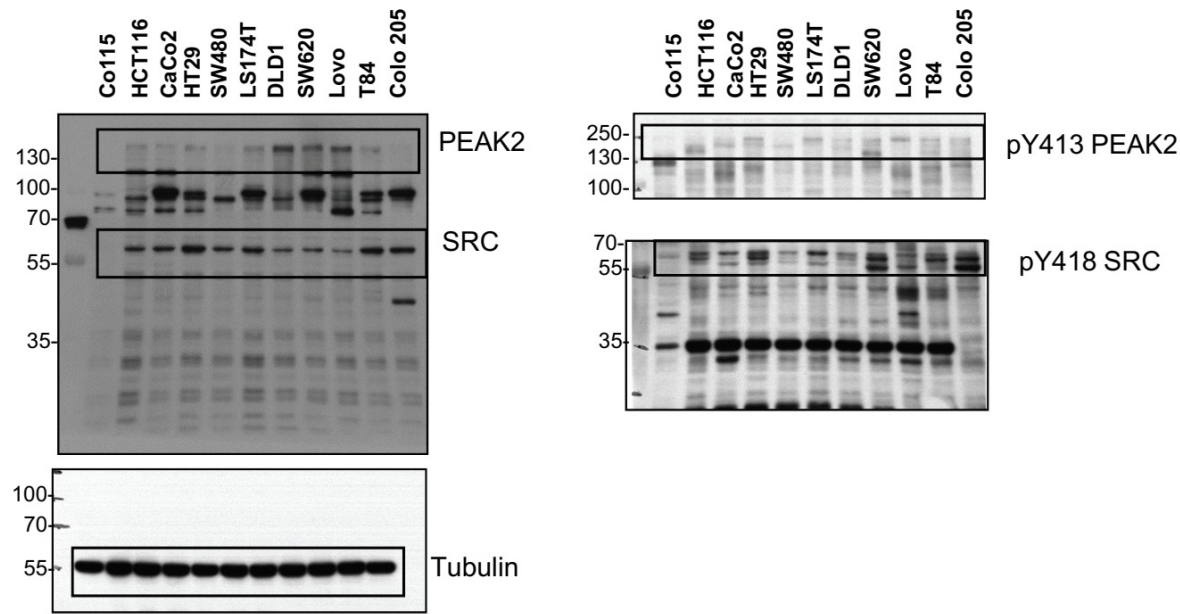

Figure 1B

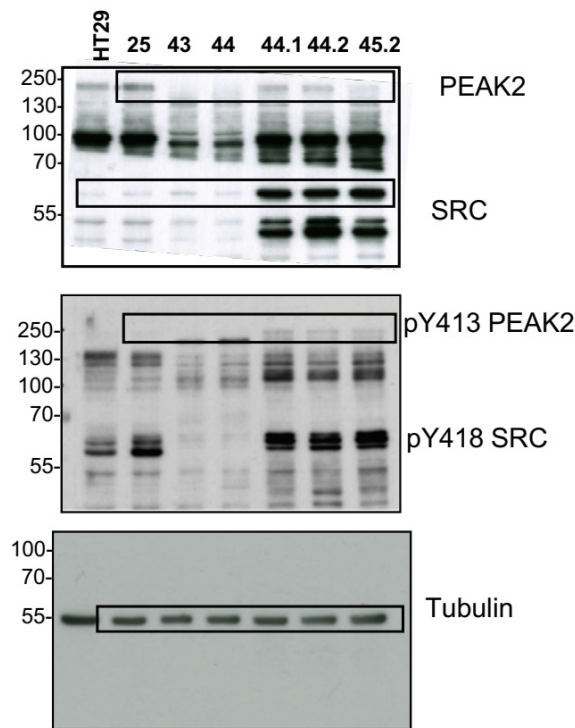

Figure 2

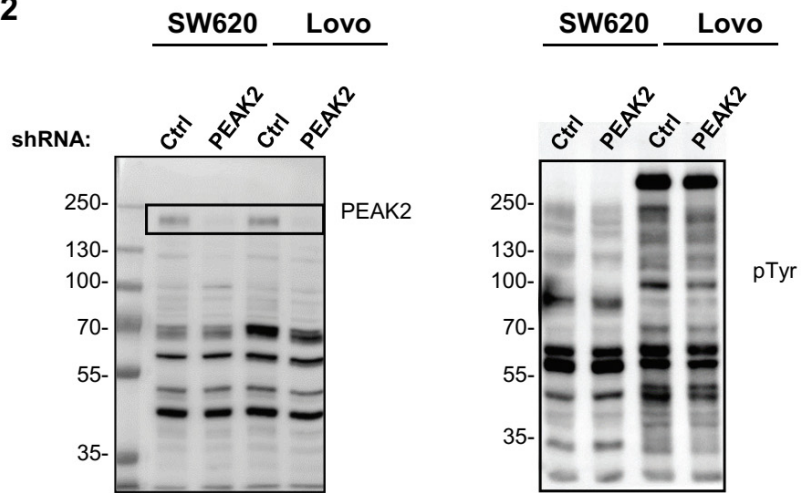

Figure 4A

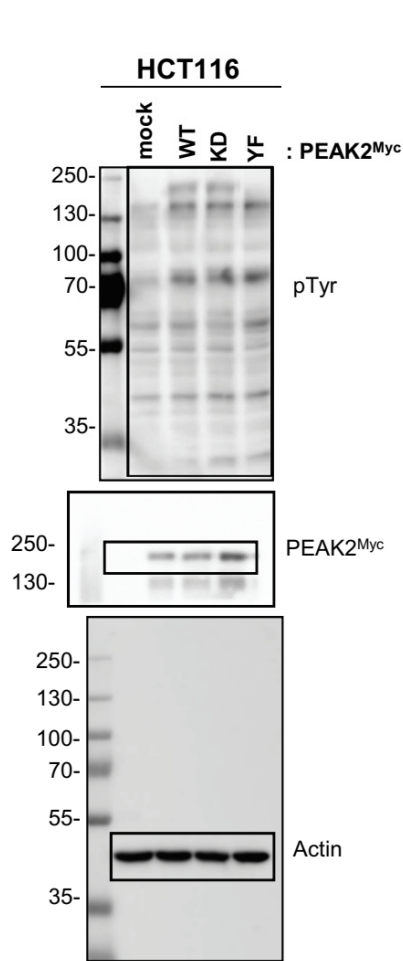

Figure 4C

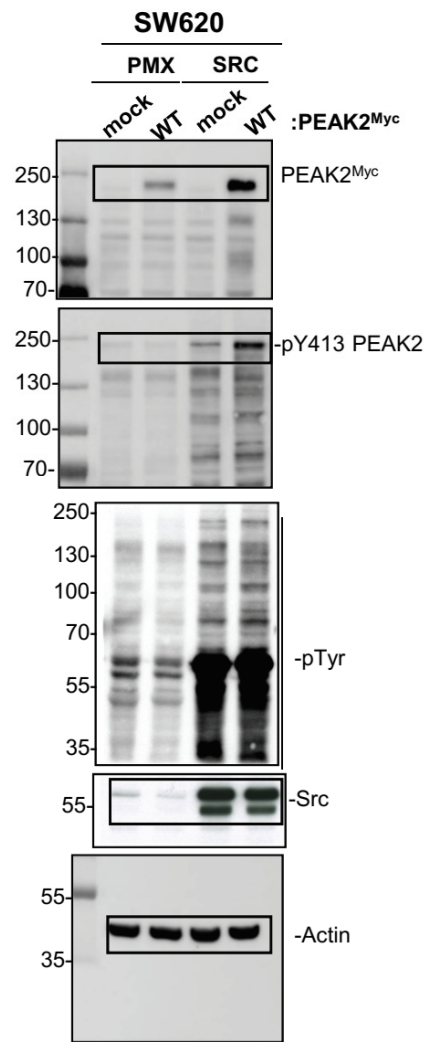

Figure 5C

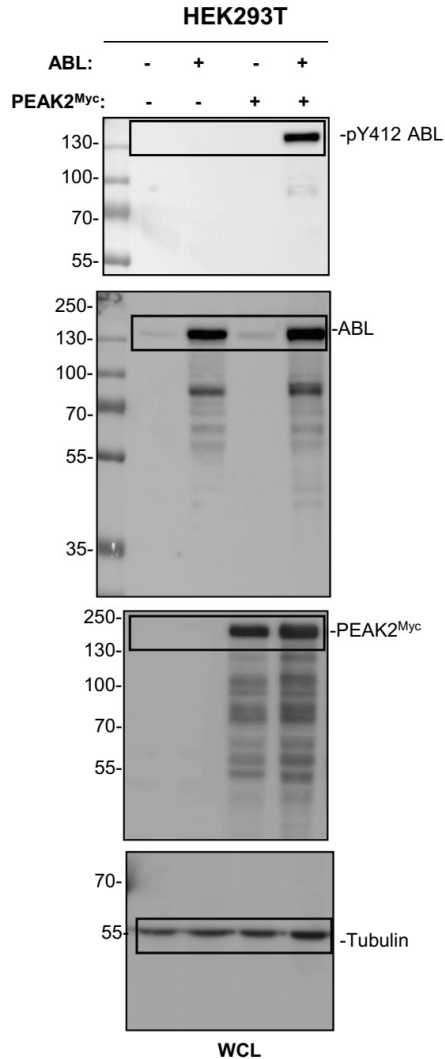

Figure 5D

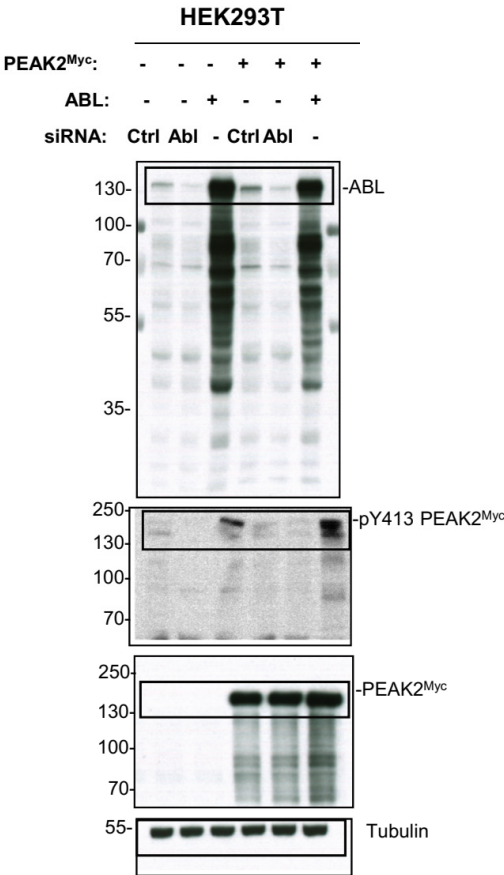

Figure 6A

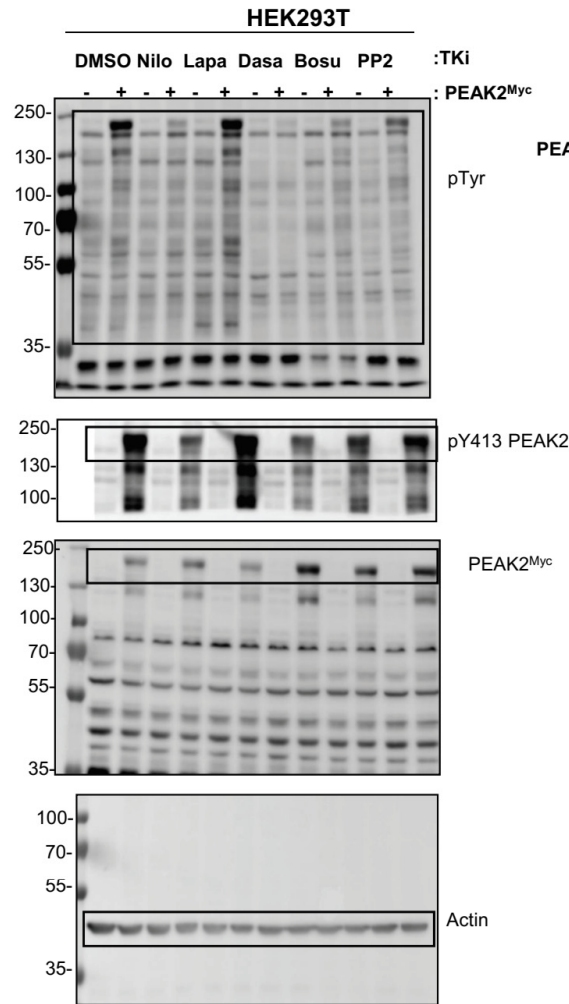

Figure 6B

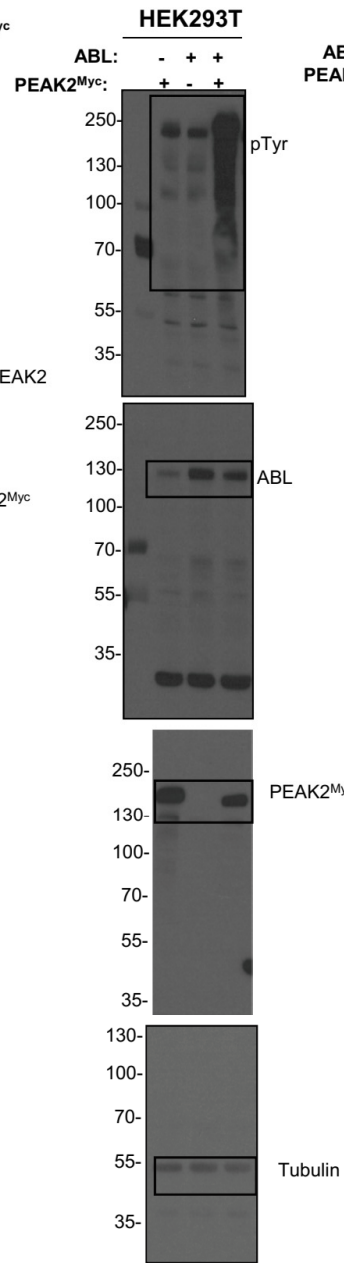

Figure 6C

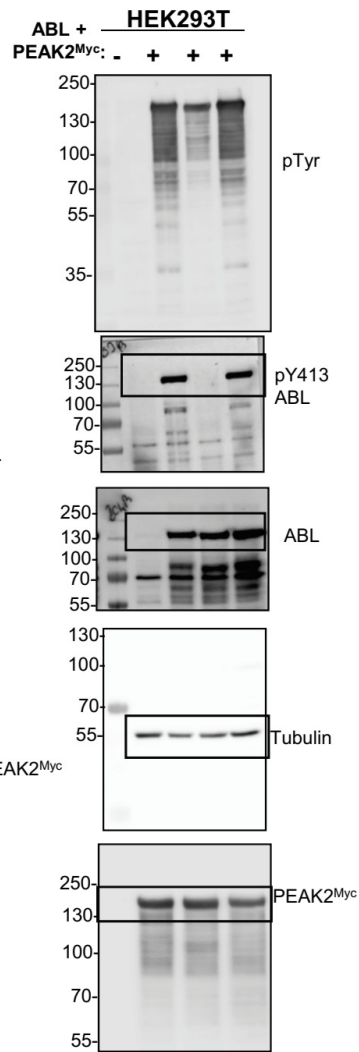

Figure S2A

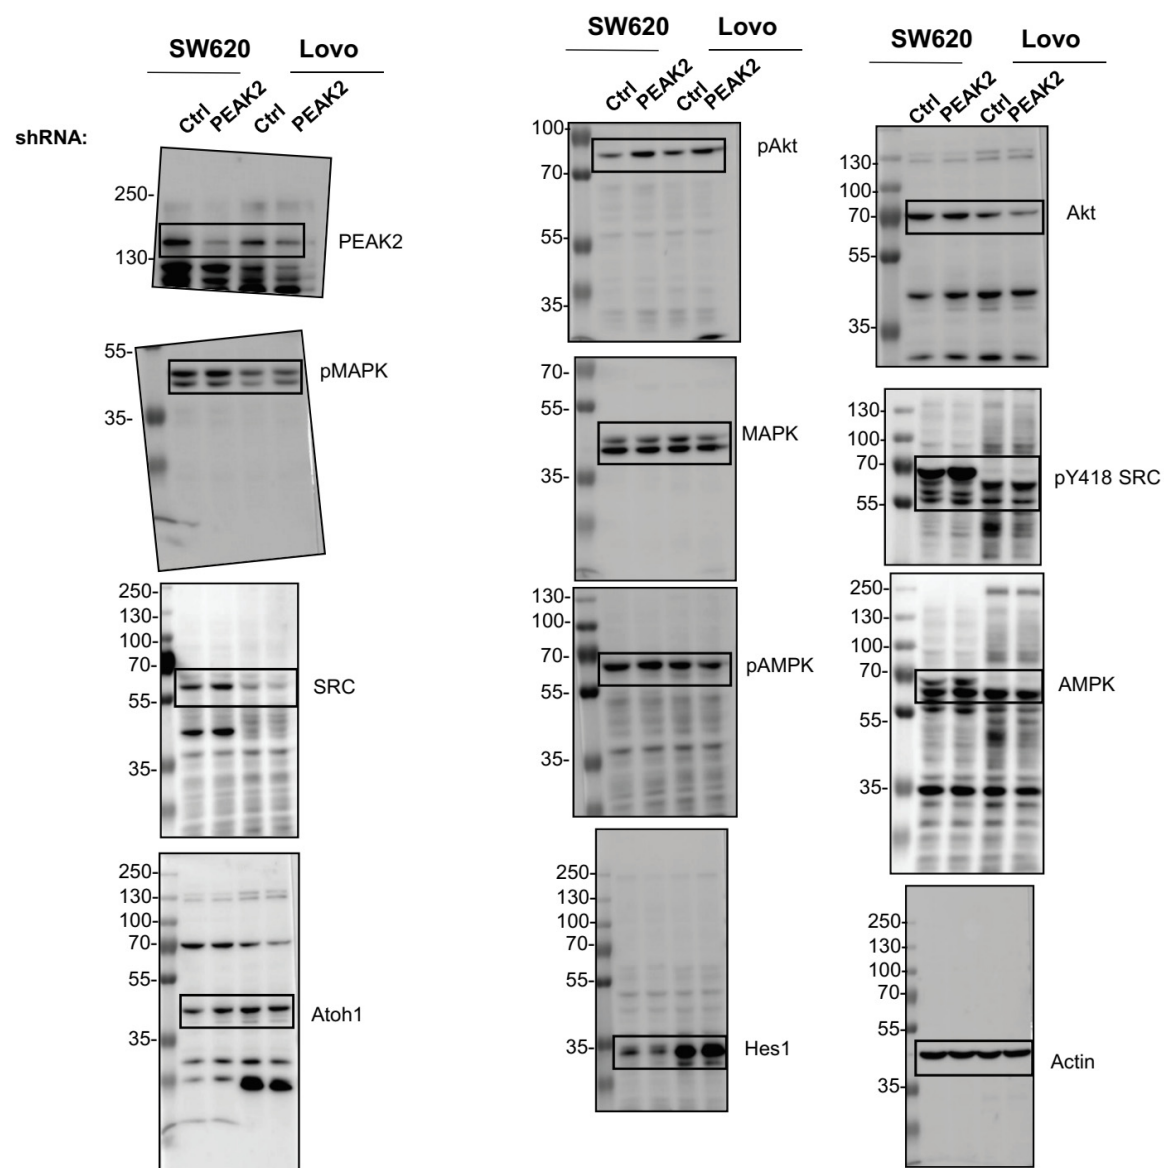

Figure S2B

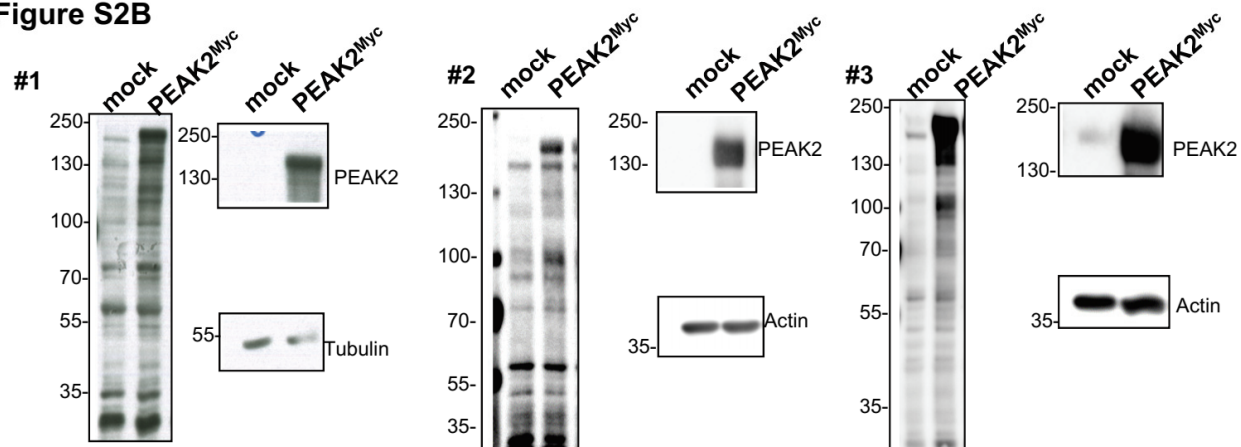

**Figure S5**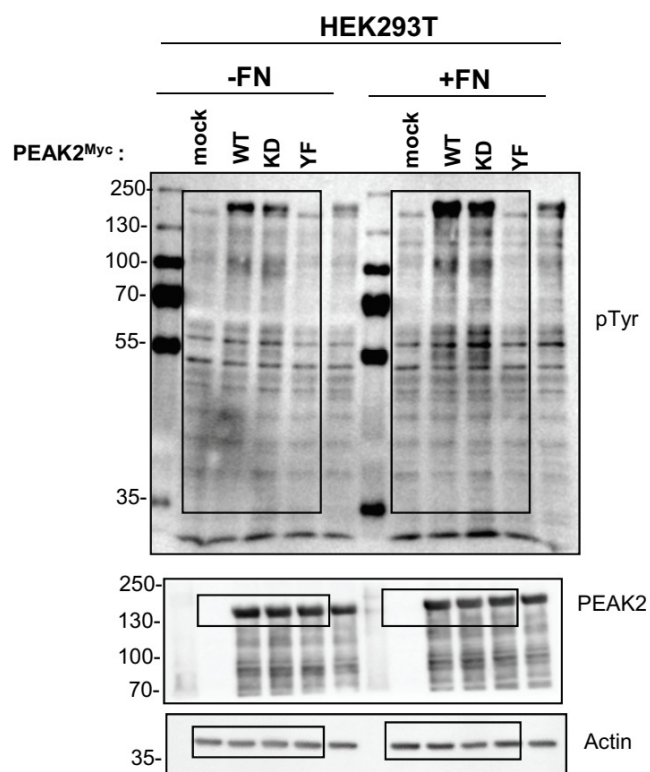**Figure S6.** original blots used in this study.
